# Supplementary material for: Dual-pH Sensitive Charge-reversal Nanocomplex for Tumor-targeted Drug Delivery with Enhanced Anticancer Activity
Source: PubMed Central journal article supplement — Theranostics. 2017 Apr 10;7(7):1806–19. doi: 10.7150/thno.18607 (PMC5479270; doi:10.7150/thno.18607), 2017-04-10
Supplement: thnov07p1806s1.pdf [file thnov07p1806s1.pdf]

## Supporting Information

# Dual-pH Sensitive Charge-reversal Nanocomplex for Tumor-targeted Drug Delivery with Enhanced Anticancer Activity

By

Qing Zhou et al.

### Contents of Supporting Information

**Figure S1.** Synthesis of (a) PMLA-PEI-DOX-TAT, (b) PEG-DMMA and (c) PEG-SA polymers.

**Figure S2.** <sup>1</sup>H NMR (400 MHz) spectrum of PMLA-PEI-DOX-TAT.

**Figure S3.** <sup>1</sup>H NMR (400 MHz) spectrum of PEG-DMMA.

**Figure S4.** <sup>1</sup>H NMR (400 MHz) spectrum of PEG-SA.

**Figure S5.** DLS results of (a) polymeric micelles PMLA-PEI-DOX, (b) PMLA-PEI-DOX-TAT and (c) nanocomplex PMLA-PEI-DOX-TAT@ PEG-SA. (d) CMC determination of polymer (PMLA-PEI-DOX-TAT) using pyrene solubilization method. The CMC is defined as the point of intersection of two exponential lines.

**Figure S6.** (a) Changes in the particle size of nanocomplex PMLA-PEI-DOX-TAT@PEG-DMMA when incubating at pH 7.4 and 6.8 for different time periods. (b) Changes in the particle size of nanocomplex PMLA-PEI-DOX-TAT@PEG-DMMA upon the incubation with PBS (pH 7.4) and RPMI 1640 medium containing 10% FBS for 14 days.

**Figure S7.** (a) Schematic illustration of DOX-CA degradation. (b) Degradation of DOX-CA incubated at pH 4.0, pH 5.0, pH 6.8 and pH 7.4 PBS solution for different periods of time detected by HPLC. (c) Degradation of PMLA-PEI-DOX-TAT incubated at pH 4.0 PBS solution for 1 h or 8 h detected by HPLC.

**Figure S8.** Release profile of DOX from PMLA-PEI-DOX-TAT in PBS (pH 5.0, pH 6.8 or pH 7.4)

at 37 °C.

**Figure S9.** Confocal microscopic images of cellular internalization of Cy3-labeled nanoparticles by MHCC97-H cells incubated at pH 7.4 and 6.8 for 4 h. DAPI (blue) was used to stain cell nucleus. The scale bar is 100  $\mu\text{m}$ .

**Figure S10.** (a) Flow cytometry analysis of cellular uptake of Cy3-labeled nanoparticles by MHCC97-H cells at pH 7.4 and pH 6.8 conditions for 4 h. (b) Quantitative analysis of the fluorescence intensity of Cy3-labeled nanoparticles in MHCC97-H cells.

**Figure S11.** Cytotoxicity of Free DOX and various nanoparticles against MHCC97-H cells at different concentrations of DOX under (a) pH 7.4 and (b) pH 6.8 for 48 h. (c) Cytotoxicity of various polymers (PMLA-PEI, PMLA-PEI-TAT, PEG-DMMA and PEG-SA) against A549 cells at different concentrations pH 7.4 for 48 h.

**Table S1.** Summary of size, zeta potential, PDI, and DOX drug content of PMLA-PEI-DOX, PMLA-PEI-DOX-TAT, PMLA-PEI-DOX-TAT@PEG-SA and PMLA-PEI-DOX-TAT@PEG-DMMA.

**Table S2.** Summary of  $\text{IC}_{50}$  value of Free DOX, PMLA-PEI-DOX, PMLA-PEI-DOX-TAT, PMLA-PEI-DOX-TAT@PEG-SA and PMLA-PEI-DOX-TAT@PEG-DMMA against A549 cells.

**Table S3.** Summary of  $\text{IC}_{50}$  value of Free DOX, PMLA-PEI-DOX, PMLA-PEI-DOX-TAT, PMLA-PEI-DOX-TAT@PEG-SA and PMLA-PEI-DOX-TAT@PEG-DMMA against MHCC97-H cells.

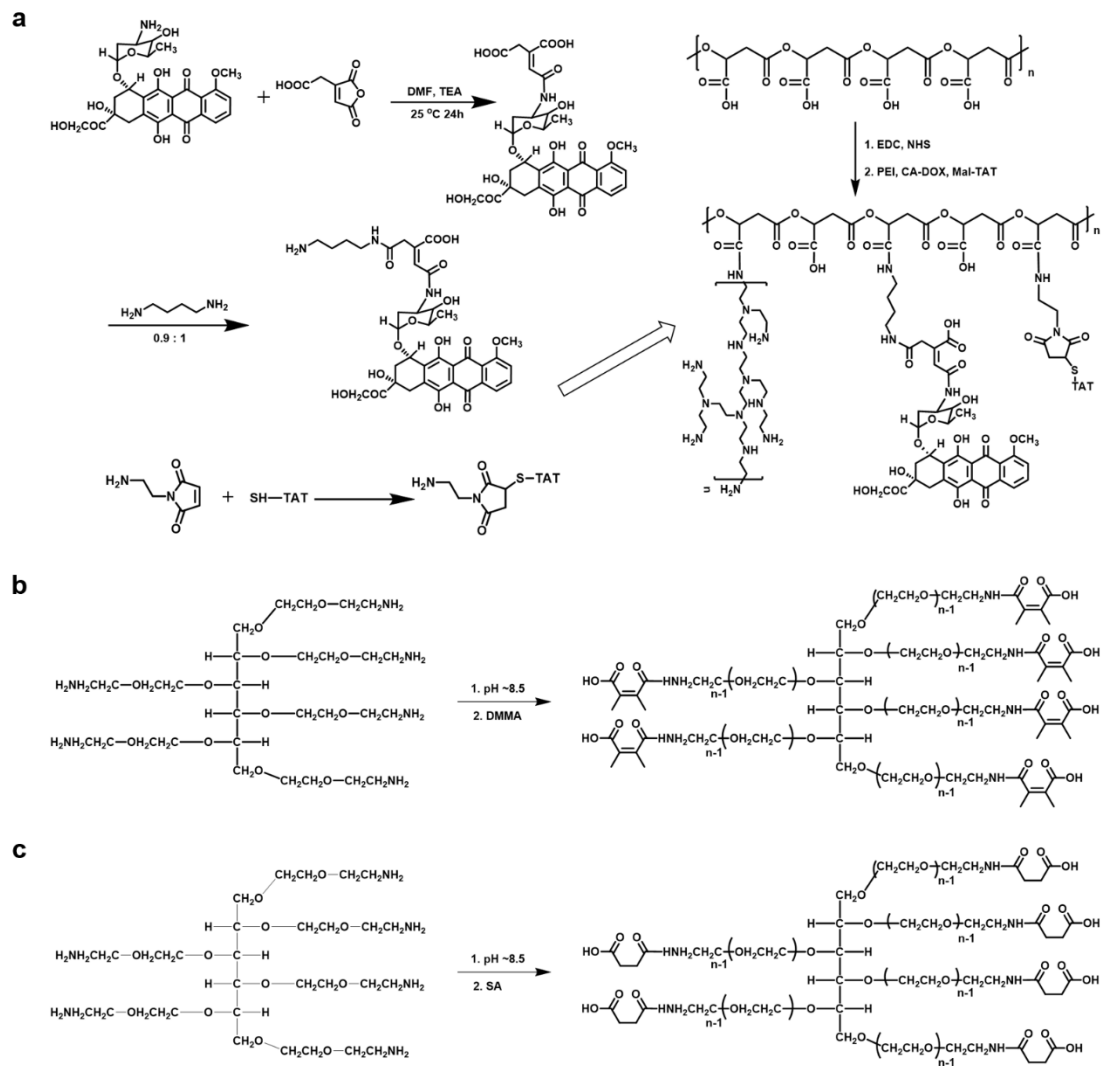

**Figure S1.** Synthesis of (a) PMLA-PEI-DOX-TAT, (b) PEG-DMMA and (c) PEG-SA polymers.

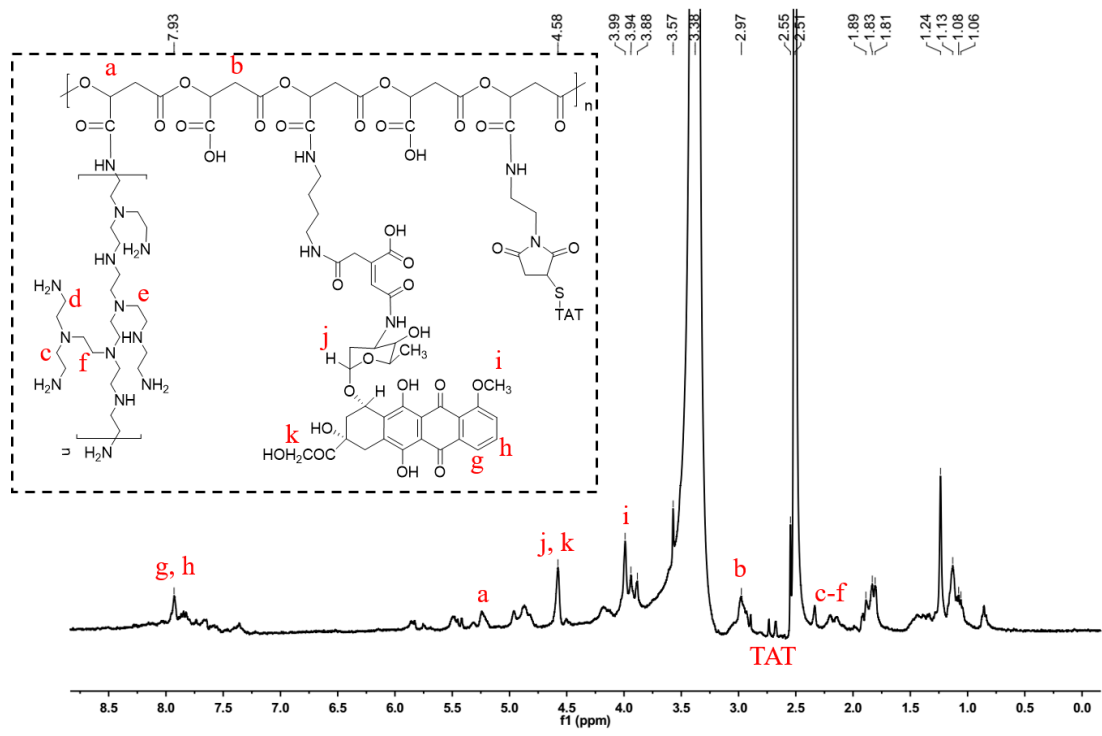

**Figure S2.** <sup>1</sup>H NMR (400 MHz) spectrum of PMLA-PEI-DOX-TAT.

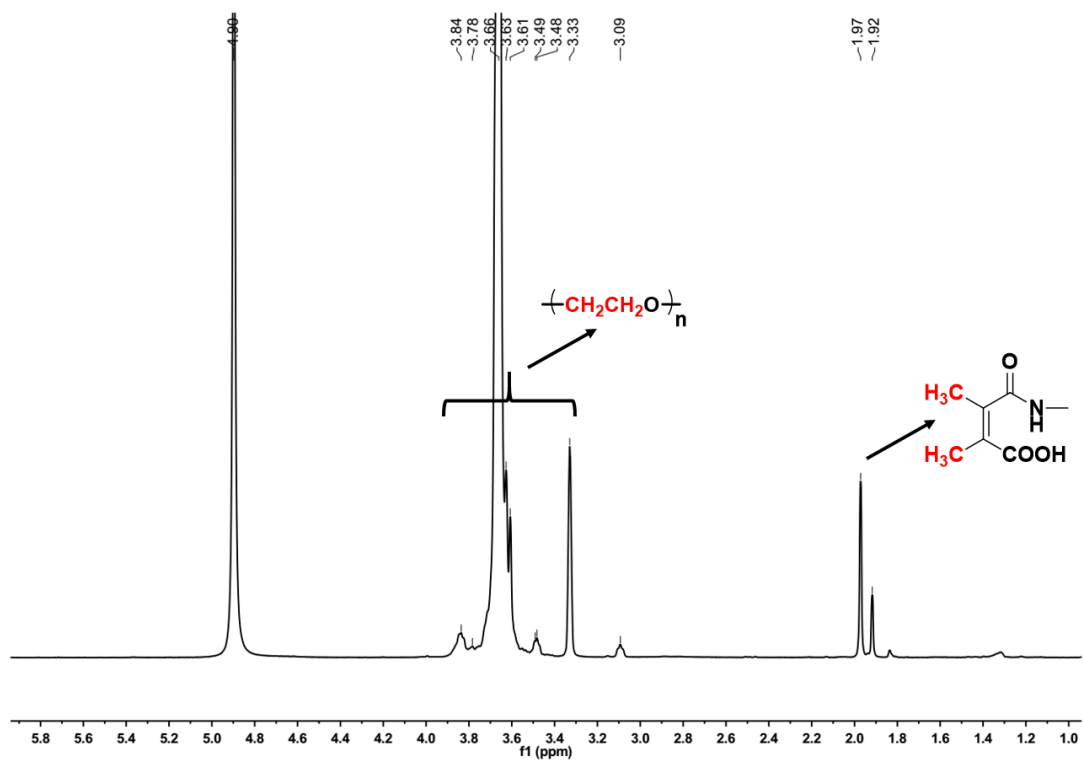

**Figure S3.**  $^1\text{H}$  NMR (400 MHz) spectrum of PEG-DMMA.

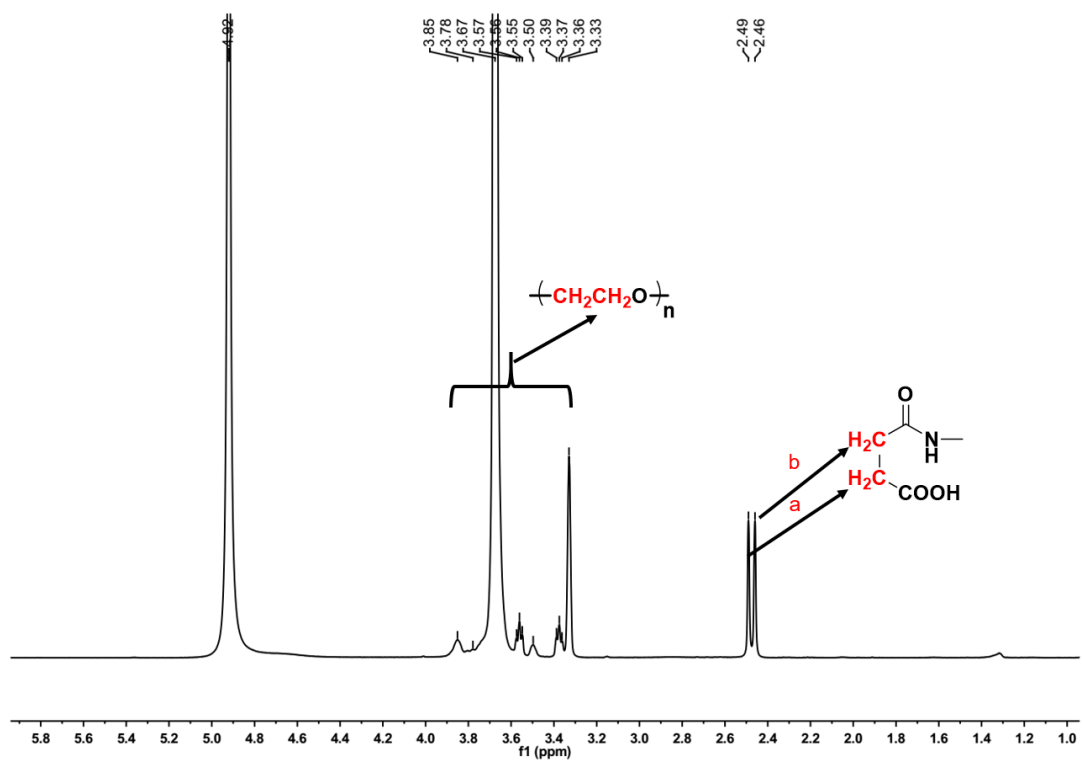

**Figure S4.**  $^1\text{H}$  NMR (400 MHz) spectrum of PEG-SA.

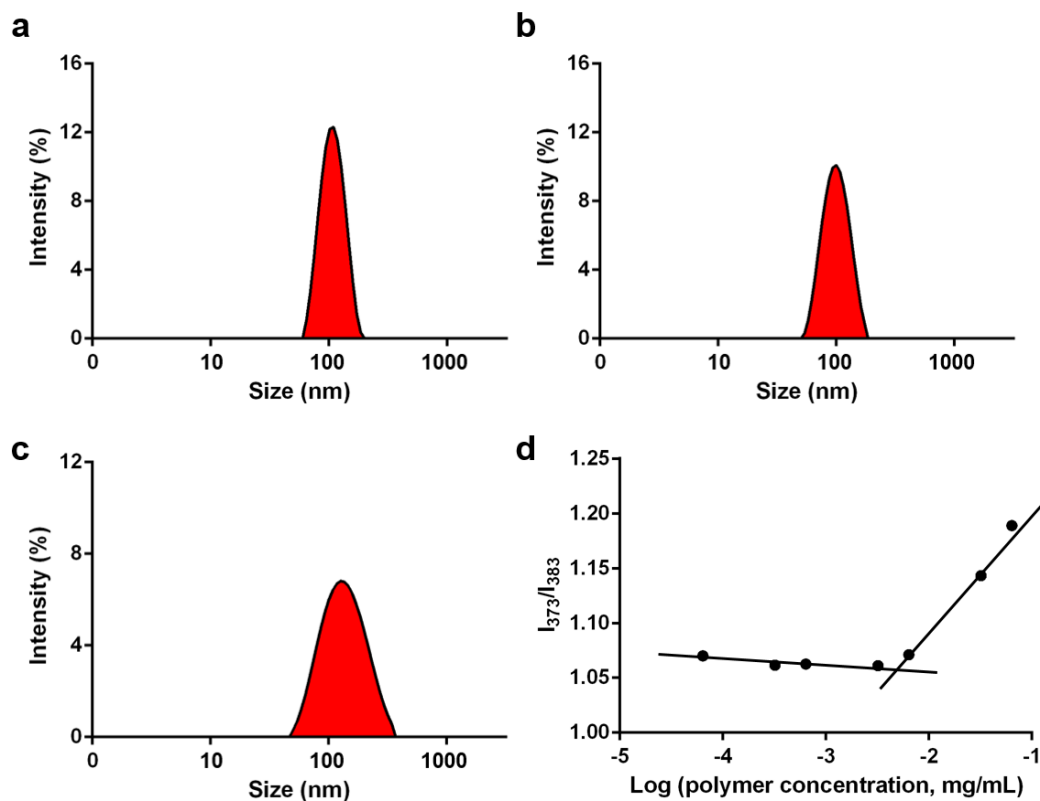

**Figure S5.** DLS results of (a) polymeric micelles PMLA-PEI-DOX, (b) PMLA-PEI-DOX-TAT and (c) nanocomplex PMLA-PEI-DOX-TAT@ PEG-SA. (d) CMC determination of polymer (PMLA-PEI-DOX-TAT) using pyrene solubilization method. The CMC is defined as the point of intersection of two exponential lines.

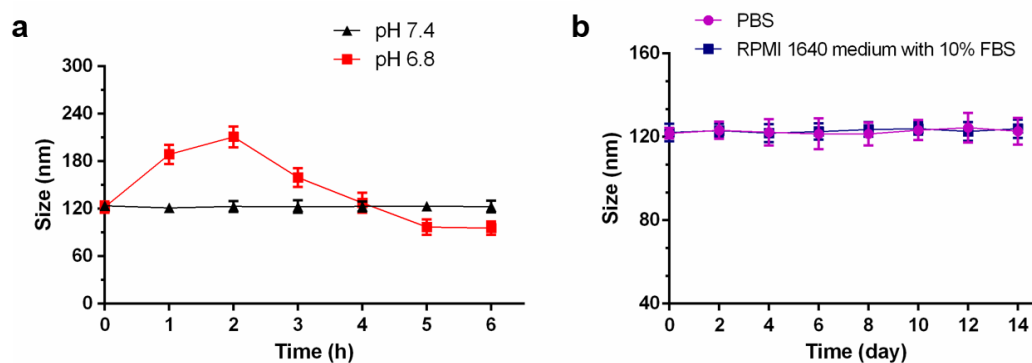

**Figure S6.** (a) Changes in the particle size of nanocomplex PMLA-PEI-DOX-TAT@PEG-DMMA when incubating at pH 7.4 and 6.8 for different time periods. (b) Changes in the particle size of nanocomplex PMLA-PEI-DOX-TAT@PEG-DMMA upon the incubation with PBS (pH 7.4) and RPMI 1640 medium containing 10% FBS for 14 days.

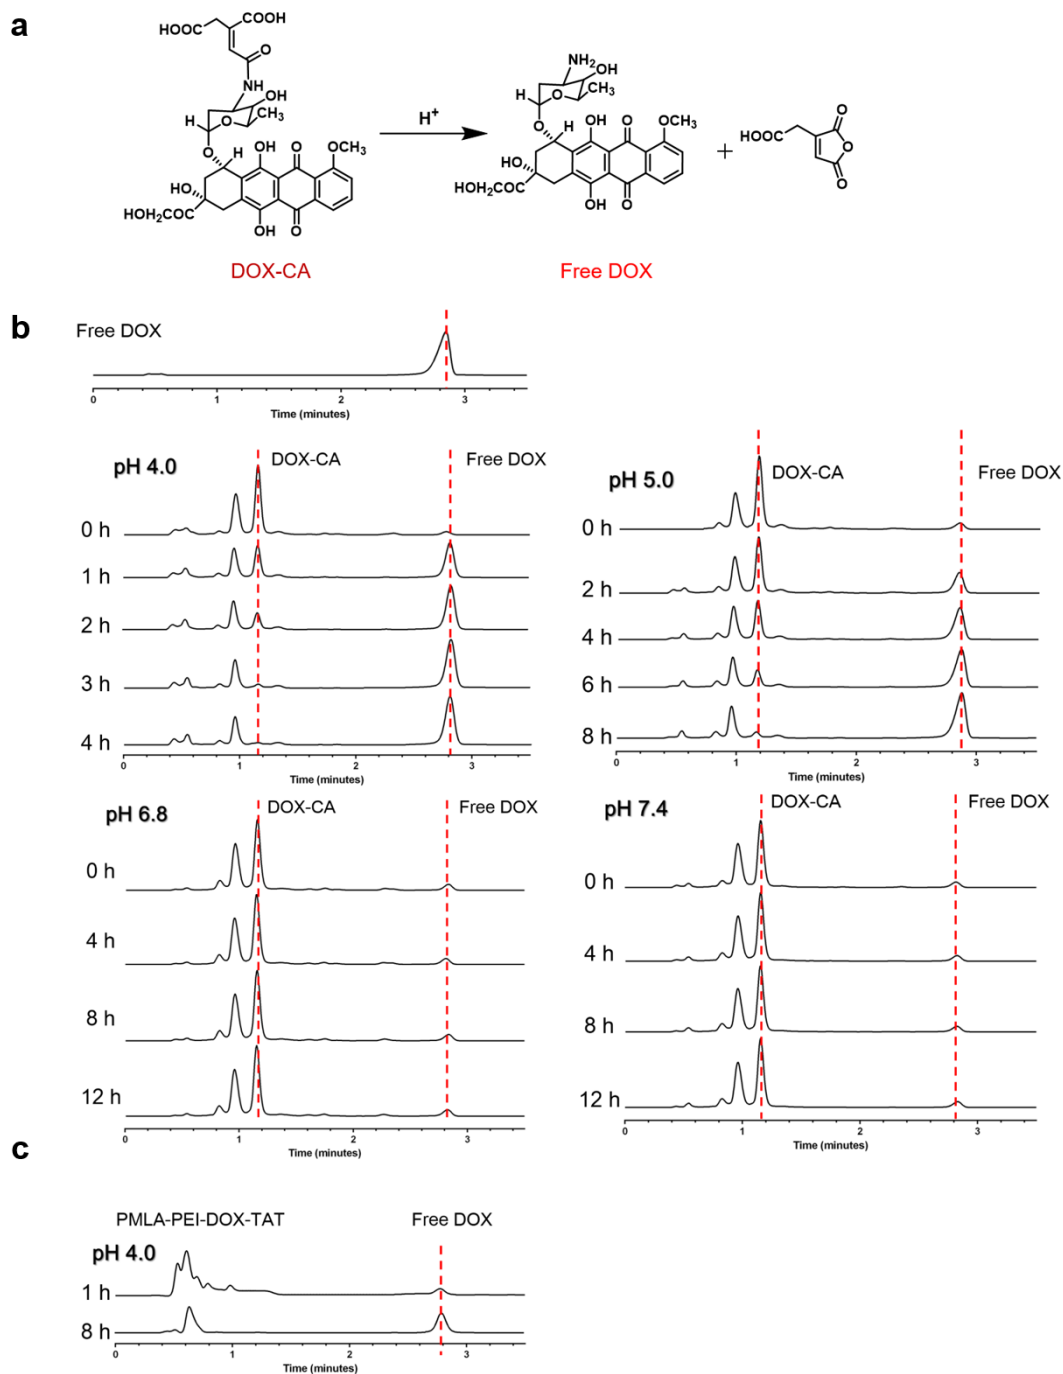

**Figure S7.** (a) Schematic illustration of DOX-CA degradation. (b) Degradation of DOX-CA incubated at pH 4.0, pH 5.0, pH 6.8 and pH 7.4 PBS solution for different periods of time detected by HPLC. (c) Degradation of PMLA-PEI-DOX-TAT incubated at pH 4.0 PBS solution for 1 h or 8 h detected by HPLC.



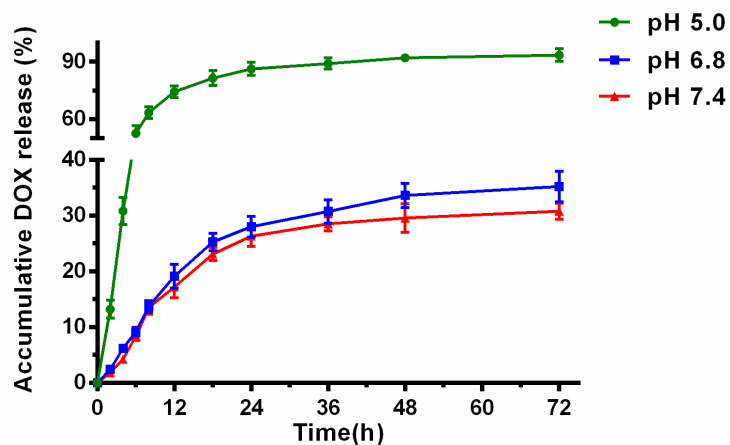

**Figure S8.** Release profile of DOX from PMLA-PEI-DOX-TAT in PBS (pH 5.0, pH 6.8 or pH 7.4) at 37 °C.

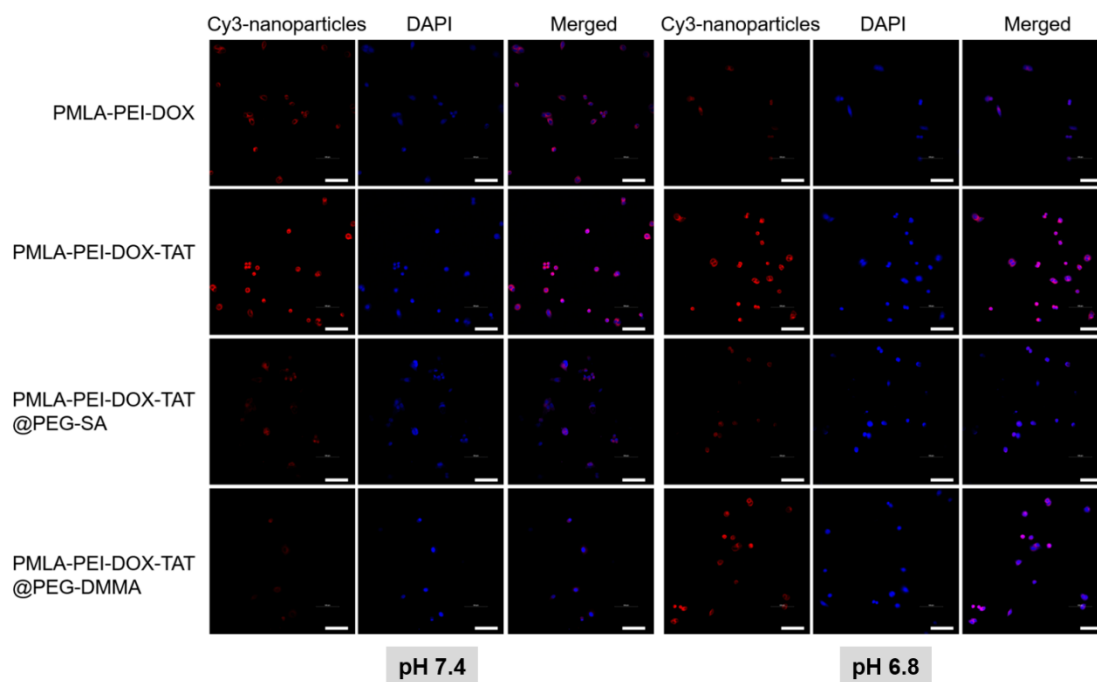

**Figure S9.** Confocal microscopic images of cellular internalization of Cy3-labeled nanoparticles by MHCC97-H cells incubated at pH 7.4 and 6.8 for 4 h. DAPI (blue) was used to stain cell nucleus. The scale bar is 100  $\mu\text{m}$ .

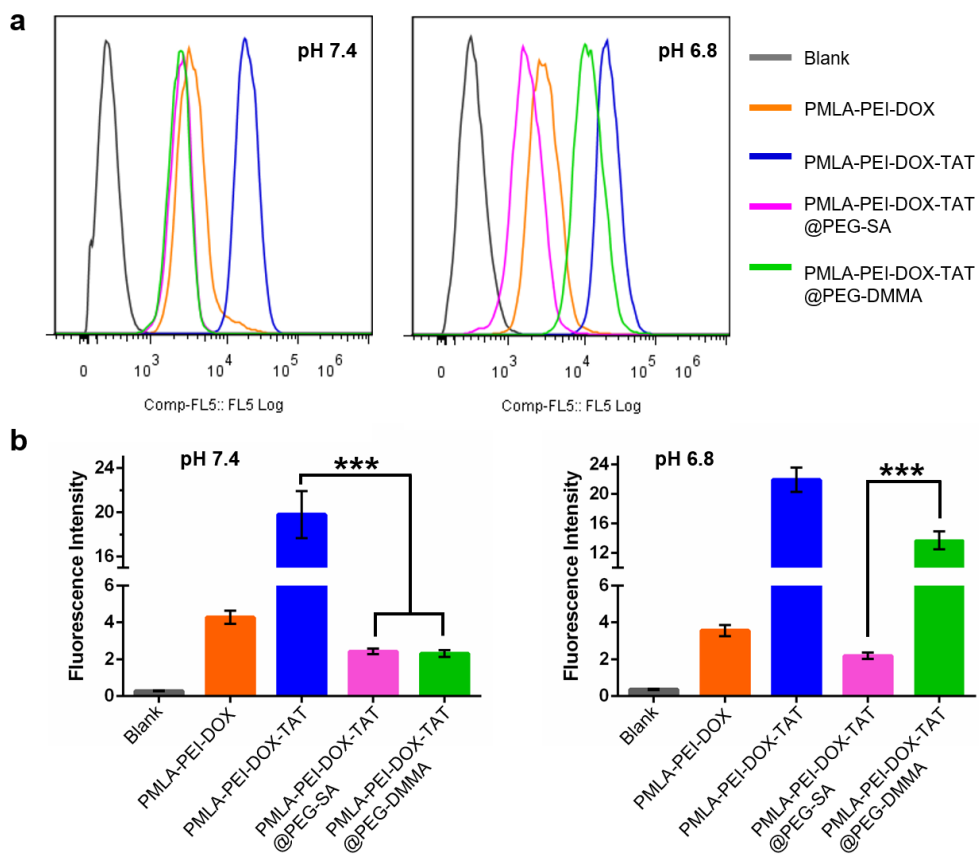

**Figure S10.** (a) Flow cytometry analysis of cellular uptake of Cy3-labeled nanoparticles by MHCC97-H cells at pH 7.4 and pH 6.8 conditions for 4 h. (b) Quantitative analysis of the fluorescence intensity of Cy3-labeled nanoparticles in MHCC97-H cells.

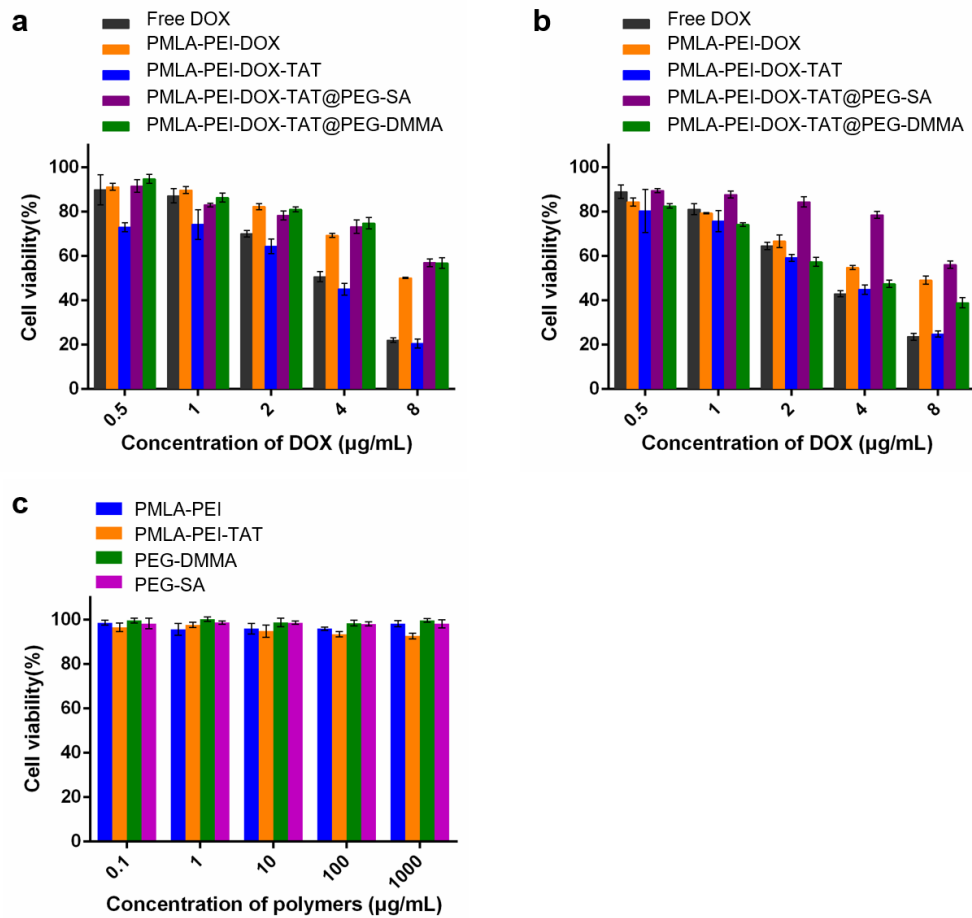

**Figure S11.** Cytotoxicity of Free DOX and various nanoparticles against MHCC97-H cells at different concentrations of DOX under (a) pH 7.4 and (b) pH 6.8 for 48 h. (c) Cytotoxicity of various polymers (PMLA-PEI, PMLA-PEI-TAT, PEG-DMMA and PEG-SA) against A549 cells at different concentrations pH 7.4 for 48 h.

**Table S1.** Summary of size, zeta potential, PDI, and DOX drug content of PMLA-PEI-DOX, PMLA-PEI-DOX-TAT, PMLA-PEI-DOX-TAT@PEG-SA and PMLA-PEI-DOX-TAT@PEG-DMMA.

|                           | Size<br>(nm) | PDI <sup>a</sup> | Zeta potential<br>(mV) | DOX content<br>(wt.%) |
|---------------------------|--------------|------------------|------------------------|-----------------------|
| PMLA-PEI-DOX              | 108.3        | 0.195            | +10.47                 | 17.71                 |
| PMLA-PEI-DOX-TAT          | 95.0         | 0.067            | +23.51                 | 16.82                 |
| PMLA-PEI-DOX-TAT@PEG-SA   | 126.1        | 0.185            | -16.04                 | -                     |
| PMLA-PEI-DOX-TAT@PEG-DMMA | 123.0        | 0.194            | -16.33                 | -                     |

<sup>a</sup> PDI: Polydispersity Index.

**Table S2.** Summary of IC<sub>50</sub> value of Free DOX, PMLA-PEI-DOX, PMLA-PEI-DOX-TAT, PMLA-PEI-DOX-TAT@PEG-SA and PMLA-PEI-DOX-TAT@PEG-DMMA against A549 cells.

|                           | IC <sub>50</sub> (pH 7.4) | IC <sub>50</sub> (pH 6.8) |
|---------------------------|---------------------------|---------------------------|
| Free DOX                  | 2.530 µg/mL               | 2.396 µg/mL               |
| PMLA-PEI-DOX              | 6.112 µg/mL               | 6.055 µg/mL               |
| PMLA-PEI-DOX-TAT          | 1.287 µg/mL               | 1.228 µg/mL               |
| PMLA-PEI-DOX-TAT@PEG-SA   | 32.58 µg/mL               | 27.36 µg/mL               |
| PMLA-PEI-DOX-TAT@PEG-DMMA | 21.28 µg/mL               | 2.744 µg/mL               |

**Table S3.** Summary of IC<sub>50</sub> value of Free DOX, PMLA-PEI-DOX, PMLA-PEI-DOX-TAT, PMLA-PEI-DOX-TAT@PEG-SA and PMLA-PEI-DOX-TAT@PEG-DMMA against MHCC97-H cells.

|                           | IC <sub>50</sub> (pH 7.4) | IC <sub>50</sub> (pH 6.8) |
|---------------------------|---------------------------|---------------------------|
| Free DOX                  | 7.410 µg/mL               | 6.344 µg/mL               |
| PMLA-PEI-DOX              | 16.87 µg/mL               | 12.97 µg/mL               |
| PMLA-PEI-DOX-TAT          | 5.605 µg/mL               | 5.822 µg/mL               |
| PMLA-PEI-DOX-TAT@PEG-SA   | 26.84 µg/mL               | 25.59 µg/mL               |
| PMLA-PEI-DOX-TAT@PEG-DMMA | 23.97 µg/mL               | 7.436 µg/mL               |
